# Supplementary material for: Ligand-exchange synthesis of selenophenolate-capped Au25 nanoclusters
Source: Royal Society of Chemistry journal article supplement (doi:10.1039/c2nr30272a), 2012-01-01
Supplement: c2nr30272a.pdf [file c2nr30272a.pdf]

## Supporting Information

### Ligand-Exchange Synthesis of Selenophenolate-Capped Au<sub>25</sub> Nanoclusters

Xiangming Meng, Qian Xu, Shuxin Wang, Manzhou Zhu\*

Department of Chemistry, Anhui University, Hefei, Anhui, 230026, P. R. China.

E-mail: zmz@ahu.edu.cn

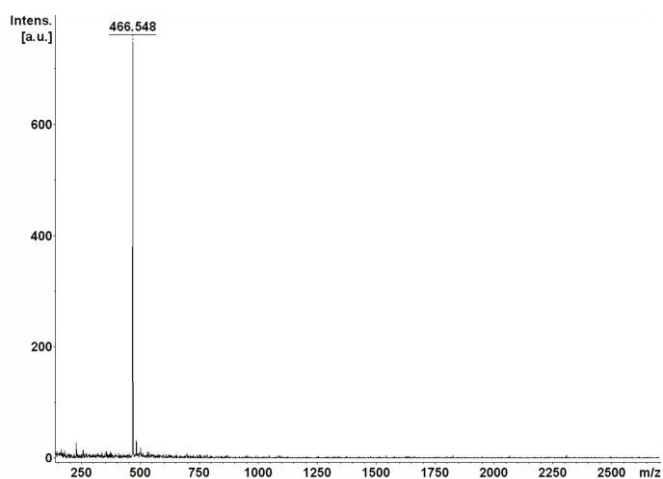

**Figure 1s.** The peak at 466.548Da is TOA<sup>+</sup> fragment of Au<sub>25</sub>(SePh)<sub>18</sub><sup>-</sup>TOA<sup>+</sup> nanoclusters using 2,5-Dihydroxybenzoic acid as the matrix.
